# Supplementary material for: QKI-5 regulates the alternative splicing of cytoskeletal gene ADD3 in lung cancer
Source: PubMed Central journal article supplement — J Mol Cell Biol. 2020 Nov 16;13(5):347–60. doi: 10.1093/jmcb/mjaa063 (PMC8373271; doi:10.1093/jmcb/mjaa063), 2020-11-16
Supplement: mjaa063_supplementary_data.pdf [file mjaa063_supplementary_data.pdf]

## Supplementary material

### **QKI-5 regulates the alternative splicing of cytoskeletal gene *ADD3* in lung cancer**

Jin-Zhu Wang<sup>1,†</sup>, Xing Fu<sup>2,†</sup>, Zhaoyuan Fang<sup>3,†</sup>, Hui Liu<sup>1</sup>, Feng-Yang Zong<sup>1</sup>, Hong Zhu<sup>1</sup>, Yan-Fei Yu<sup>1</sup>, Xiao-Ying Zhang<sup>1</sup>, Shen-Fei Wang<sup>1</sup>, Ying Huang<sup>4</sup>, and Jingyi Hui<sup>1,\*</sup>

<sup>1</sup> State Key Laboratory of Molecular Biology, Center for Excellence in Molecular Cell Science, Shanghai Institute of Biochemistry and Cell Biology, Chinese Academy of Sciences, University of Chinese Academy of Sciences, Shanghai 200031, China

<sup>2</sup> Shanghai Center for Plant Stress Biology, Chinese Academy of Sciences, Shanghai 201602, China

<sup>3</sup> Key Laboratory of Systems Biology, Center for Excellence in Molecular Cell Science, Shanghai Institute of Biochemistry and Cell Biology, Chinese Academy of Sciences, University of Chinese Academy of Sciences, Shanghai 200031, China

<sup>4</sup> Department of General Surgery, Shanghai Key Laboratory of Biliary Tract Disease Research, State Key Laboratory of Oncogenes and Related Genes, Xinhua Hospital, Shanghai Jiao Tong University, Shanghai 200092, China

† These authors contributed equally to this work.

\* Correspondence to: Jingyi Hui, E-mail: [jyhui@sibcb.ac.cn](mailto:jyhui@sibcb.ac.cn), Tel: +86-21-54921354

## Supplementary material

3 Supplementary Figures

1 Supplementary Table

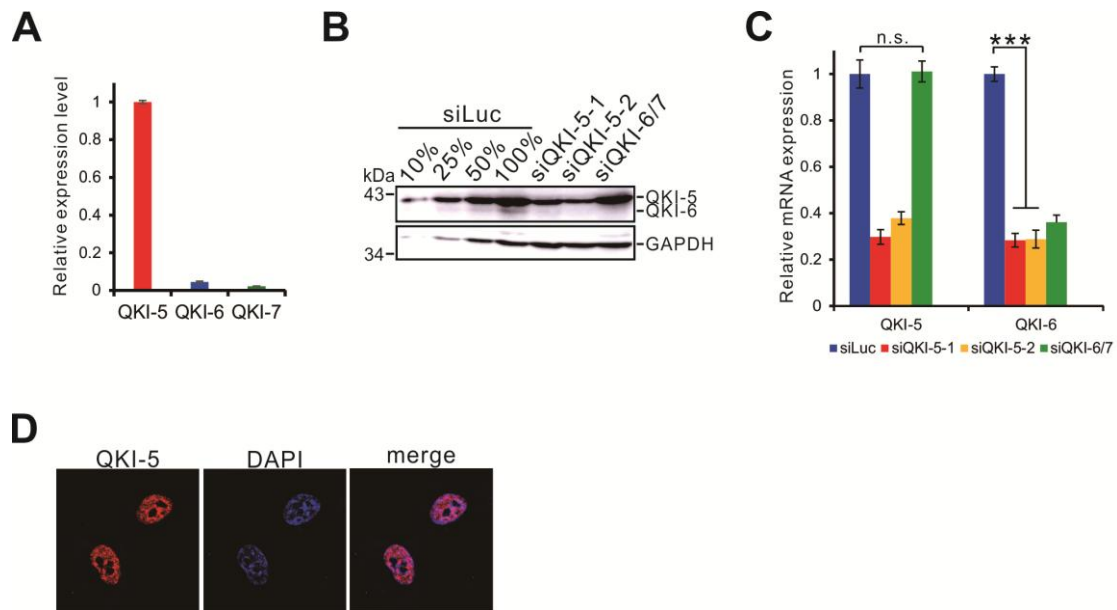

**Supplementary Figure S1** QKI-5 is the dominant form of QKI proteins in lung cancer cells and required for QKI-6 expression. **(A)** RT-qPCR analysis of QKI-5, QKI-6, and QKI-7 mRNAs in BEAS2B cells. **(B)** Western blot analysis of QKI expression in BEAS2B cells transfected with control-, QKI-5, QKI-6/7 siRNAs. **(C)** RT-qPCR analysis of QKI-5 and QKI-6 mRNAs in cells treated as in **(B)**. **(D)** Immunofluorescent staining of QKI-5 (red) and DAPI (blue) in A549 cells.

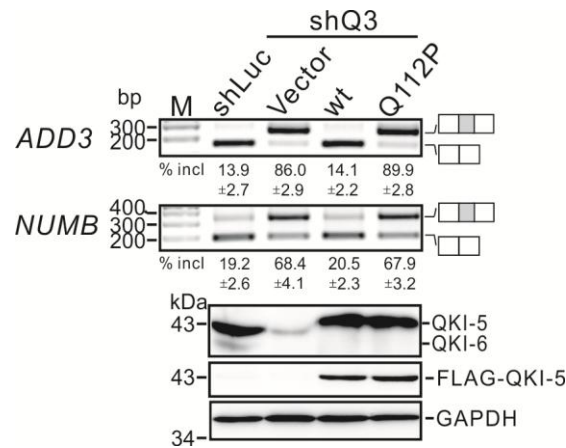

**Supplementary Figure S2** Q112P mutation in QKI does not affect the splicing of ADD3 and NUMB. RT-PCR analysis of the splicing patterns of ADD3 and NUMB in control- or QKI-specific knockdown BEAS2B cells or QKI-knockdown cells expressing wildtype or Q112P mutant QKI-5. The average percentages of exon inclusion with standard deviations are shown below (n=3).

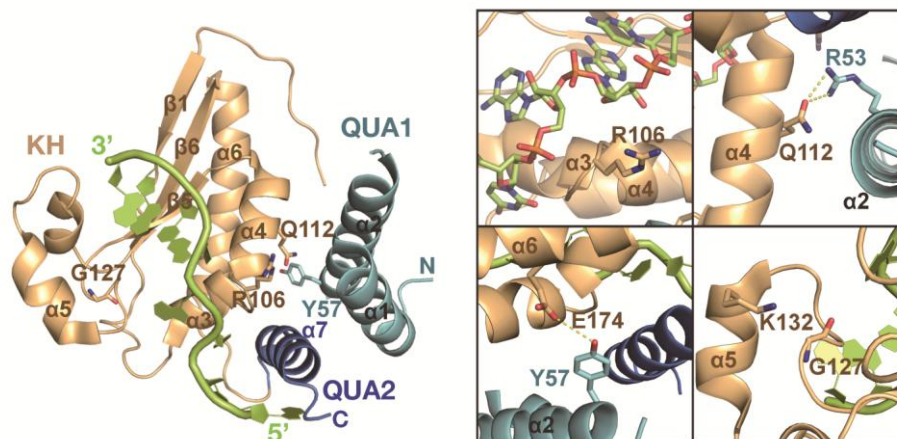

**Supplementary Figure S3** Cartoon representation of the structure of QKI-5-RNA complex (PDB 4JVH). Key residues Y57, R106, Q112, and G127 are shown in stick.

**Supplementary Table S1**

| <b>Oligonucleotide name</b> | <b>Oligonucleotide sequences (5'-3')</b>                           |
|-----------------------------|--------------------------------------------------------------------|
| ADD3- <i>Hind</i> III-for   | TTAAAAAGCTTGAAGATGATGATCATGGCCC                                    |
| ADD3- <i>Xho</i> I-rev      | TTAAACTCGAGTCGCTTAGCAAGCTCATCTTC                                   |
| ligation primer1            | TAGCTACTCTGGTTTTCTAATGCTAGCAAGA                                    |
| ligation primer2            | TTAGAAAACCAGAGTAGCTAGGACTAC                                        |
| ligation primer 3           | GCTGAGGCAGGAATTAACATCTCCCAATCAG                                    |
| ligation primer 4           | TGTTTAATTCCTGCCTCAGCCTCCCAA                                        |
| ADD3 Mut1 for               | GGCTTTTGACTGAACTCTTATCCAACAGATGCT                                  |
| ADD3 Mut1 rev               | AAGAGTTCAGTCAAAAGCCATGCAAAACAAAAC                                  |
| ADD3 Mut2 for               | TGCGCTGACCTCCCTGAAATCATATGCTGCTTTGTTTT                             |
| ADD3 Mut2 rev               | TTTCAGGGAGGTCAGCGCATAACATCAATGCCTGTAT                              |
| ADD3 Mut4 for               | AATGTTGACACATTGACCTCCTCTTGATGTATGATTATGGATATATGGGAT<br>GACTGTTAGCA |
| ADD3 Mut4 rev               | AGGTCAATGTGTCAACATTTCTGGCTGCTAATGGTCATTTACGTACAG<br>GTCACAAAAGATG  |
| ADD3 Mut5 for               | GCCAGAAATGTTGACACATTGACCTCCTCTTAATGTATGATTATGGAT                   |
| ADD3 Mut5 rev               | GCATGCTAACAGTCATCCCATATATCCATAATCATAACATTAAGAGG                    |
| ADD3 Mut6 for               | TTTGTGACCTGTACGTGAAATGACCATT                                       |
| ADD3 Mut6 rev               | GCATGCTAACAGTCATCCCATATATCCATAATCATAACATTAAGAGG                    |
| QKI5-FLAG-rev               | TTAAATCTAGATTACTTGTGTCGTCATCGTCTTTGTAGTCGTTGCCGGTGGC<br>GGCTC      |
| QKI5-for                    | TTAAAGGATCCATGGTCGGGGAAATGGAAAC                                    |
| QKI5 Mut1 for               | AAGACATGCACAATGACACATTAATGGCA                                      |
| QKI5 Mut1 rev               | TGTGTCATTGTGCATGTCTTTCCGTA CTCTGC                                  |
| QKI5 Mut2 for               | GACCTACAGGACTTACAGCCAAACA                                          |
| QKI5 Mut2 rev               | GGCTGTAAGTCCTGTAGGTCCAAGGATTCTCCC                                  |
| QKI5 Mut3 for               | AAACCACTTGAAGCAGAAACCGGATG                                         |
| QKI5 Mut3 rev               | GTTTCTGCTTCAAGTGGTTTGGCTGTAAGTCCTCTA                               |
| QKI5 Mut4 for               | ATTATTGGTACGTGCAGCAGAAGGAGAAGACA                                   |
| QKI5 Mut4 rev               | CTGCTGCACGTACCAATAATTTCTTCACTTCT                                   |
| QKI5 Mut5 for               | GAGGCAAAGTCTCAATGAGGGATAAAAAA                                      |
| QKI5 Mut5 rev               | CCTCATTGAGACTTTGCCTCGGACCATGAT                                     |
| QKI5 Mut6 for               | GCAGTTGAAAAAGTGAAGAAATTATTGGTA                                     |

|                       |                                                                                             |
|-----------------------|---------------------------------------------------------------------------------------------|
| QKI5 Mut6 rev         | TTCTTCACTTTTTCAACTGCTCTCTTCAATTT                                                            |
| QKI5 Mut7 for         | AAGCAGAAACCAGATGTAAAATCATGGTCCGA                                                            |
| QKI5 Mut7 rev         | TTTACATCTGGTTTCTGCTTCAAGTTGTTT                                                              |
| QKI5 Mut8 for         | TGATAGAGCTTGCGATTCTGAATGG                                                                   |
| QKI5 Mut8 rev         | CAGAATCGCAAGCTCTATCAGCTGCATCTTCTTC                                                          |
| QKI5 Mut9 rev         | TTAAATCTAGACTTGTGCGTCATCGTCTTTGTAGTCTCCTTCTGCTGCA<br>GGTAC                                  |
| ADD3 for              | ACCAGCTCCTCCTAACCCA                                                                         |
| ADD3 rev              | CATCCTTGCCATTTACTACC                                                                        |
| NUMB for              | AGGGGAGGCAGAGAGCAT                                                                          |
| NUMB rev              | TCTATGACCGGCCTGGAA                                                                          |
| ctrl ASO              | CCUAUAGGACUAUCCAGGAA (each base with<br>2'-O-methoxyethyl-phosphorothioate modifications)   |
| ADD3 ASO-1            | ACAUUGAGUACCUUCUAAUUUU (each base with<br>2'-O-methoxyethyl-phosphorothioate modifications) |
| ADD3 ASO-2            | CUGCUCAGCAUCUGUUGGAUAA (each base with<br>2'-O-methoxyethyl-phosphorothioate modifications) |
| shLuc target sequence | CGTACGCGGAATACTTCGA                                                                         |
| shQ3 target sequence  | GAAGAGAGCAGTTGAAGAA                                                                         |
| siRNA-QKI5-1          | CUAUGACCUUCUGACCUCUGAAUU                                                                    |
| siRNA-QKI5-3          | AGUAGAUACUUUUACUUAACAAGGUU                                                                  |
| siRNA-QKI6/7          | GAAUUCAAGAACGGUCUUAUUU                                                                      |
